# Supplementary material
Source: PubMed Central journal article supplement (PMC4593654)
Supplement: NIHMS237148-supplement-1.pdf [file NIHMS237148-supplement-1.pdf]

**Title**

The Changes in Home versus Clinic Blood Pressure with Antihypertensive Treatments: a Meta-analysis

Joji Ishikawa, MD, PhD, Deirdre J. Carroll, MD, Sujith Kruville, MD, Joseph E Schwartz, PhD,  
Thomas G Pickering, MD, DPhil

Center for Behavioral Cardiovascular Health, Department of Medicine, Columbia University  
Medical Center, New York, NY, USA (J.I., D.J.C, S.K., J.E.S., and T.G.P.)

Department of Psychiatry and Behavioral Science, Stony Brook University, Stony Brook, NY,  
USA (J.E.S.)

**Short title:** Meta-analysis of home blood pressure reduction

**Number of words in abstract:** 242

**Number of words in text:** 3960

**Number of Tables (3) and Figures (5)**

**Address correspondence to**

Thomas G Pickering, MD, DPhil

Center for Behavioral Cardiovascular Health

Division of General Medicine, Department of Medicine

Columbia University Medical Center

622 West 168<sup>th</sup> Street, New York, NY 10032

E-mail: [tp2114@columbia.edu](mailto:tp2114@columbia.edu)

Phone: 212.305.6173, Fax: 212.305.3172

or

Joji Ishikawa, MD, PhD

Center for Behavioral Cardiovascular Health

Division of General Medicine, Department of Medicine

Columbia University Medical Center

622 West 168<sup>th</sup> Street, New York, NY 10032

E-mail: [ji2149@columbia.edu](mailto:ji2149@columbia.edu)

Phone: 212.305.6173, Fax: 212.305.3172

Division of Cardiovascular Medicine, Department of Internal Medicine

Jichi Medical University School of Medicine

Yakushiji 3311-1, Shimotsuke, Tochigi, Japan 329-0498

E-mail: [george@jichi.ac.jp](mailto:george@jichi.ac.jp)

Phone: +81.285.58.7344, Fax: +81.285.44.5317

**Characteristics and home blood pressure measurement methods of 30 collected papers**

| First author | Age years | Backgrounds |                       |                 | Subj.  | N. Sub. | Clinic BP                   |                    | HBP measurements |      |      |
|--------------|-----------|-------------|-----------------------|-----------------|--------|---------|-----------------------------|--------------------|------------------|------|------|
|              |           | Male %      | BMI kg/m <sup>2</sup> | Previous HT Tx. |        |         | Clinic BP devices           | Home BP devices    | N. HBP           | Time | Dur. |
| Mengden T    | 53        | 63.2        | NA                    | Placebo         | HT     | 19      | Sphg.                       | Visomat OZ1        | ?                | ME   | 2 w  |
| Chatellier G | 57        | 55          | 26                    | Washout         | HT     | 816     | Sphyg.                      | UA751, A&D         | 3                | ME   | 4 d  |
| Vaur L       | 56        | 62.5        | NA                    | Washout         | HT     | 24      | Mercury sphyg.              | A&D UA751          | 3                | ME   | 7 d  |
| Bailey B     | 56        | 45          | 29                    | T, NonT         | HT     | 31      | Sphyg.                      | Omron HEM 706      | ?                | ME   | ?    |
| Fernandez-G  | 59.3      | 42.9        | 28                    | Washout         | HT     | 1395    | Omron HEM-705CP             | Omron HEM-705CP    | 2                | ME,  | ?    |
| Leeman MJ    | 55        | 50          | 27.3                  | Washout         | HT     | 760     | Mercury or Aneroid          | Omron HEM-705CP    | 2                | ME   | 8 D  |
| Ragot S      | 55.6      | 56          | NA                    | Placebo         | HT     | 199     | Mercury sphyg.              | UA751, A&D         | 3                | ME   | 7 d  |
| Broege PA    | 73        | 68          | 25.8                  | T, NonT         | HT     | 20      | Sphyg.                      | Omron HEM-702      | 3                | ME   | ?    |
| Mancia G     | 55.4      | 67          | NA                    | Placebo         | HT     | 215     | Sphyg,                      | Pressolink-T       | 3                | ME   | 7 d  |
|              | 55.1      | 62          | NA                    |                 |        | 211     |                             |                    |                  |      |      |
| Ragot S      | 55.1      | 57          | NA                    | Placebo         | HT     | 217     | Omron HEM-705CP             | Omron HEM-705CP    | 3                | ME   | 7 d  |
|              | 55.5      | 52          | NA                    |                 |        | 218     |                             |                    |                  |      |      |
| Stergiou GS  | 46.6      | 48.5        | NA                    | Washout         | HT     | 33      | Sphyg.                      | Omron HEM-705CP    | 2                | ME   | 5 d  |
| Suzuki H     | 56        | 59.3        | NA                    | Washout         | HT     | 113     | Sphyg.                      | Omron HEM 401C     | 1                | ME   | 2 d  |
| Mengden T    | 57.7      | 54.7        | 28.1                  | T, NonT         | HT     | 53      | Usual device                | TensioPhone 2      | ≥1               | ME   | ?    |
| Mion D       | 66.3      | 27.7        | 27.0                  | Placebo         | HT     | 65      | Omron IC                    | Omron IC           | 3                | ME   | 7 d  |
| Staessen JA  | 52.6      | 48.2        | 27.7                  | T, NonT         | HT     | 197     | Shyg. ?                     | Omron HEM-705CP    | 3                | ME   | 7 d  |
|              | 54.2      | 47.3        | 28.5                  | T, NonT         | HT     | 203     |                             |                    |                  |      |      |
| Girerd X     | 64        | 44          | 29                    | Treated         | HT     | 171     | TensioPhone                 | TensioPhone        | 3                | ME   | 4 d  |
| Halme L      | 57.4      | 30.1        | 28.1                  | T, NonT         | HT     | 113     | Omron M4                    | Omron M4           | 2                | ME   | 7 d  |
| Borie G      | 60        | 60          | 28.0                  | T, NonT         | HT     | 227     | Sphyg. or Electrical device | Tensio Day Monitor | 3                | ME   | 5 d  |
|              | 59        | 53          | 27.6                  |                 |        | 222     |                             |                    |                  |      |      |
| Hashimoto J  | 61.6      | 55.3        | 26.4                  | Treated         | HT     | 76      | NA                          | Omron HEM701C,     | 1                | ME   | 5 d  |
| Kamoi K      | 67.0      | 36.0        | 24.2                  | T, NonT         | Mo. HT | 50      | FT-200                      | Semiautomatic      | 1                | M    | ?    |
| Niiranen TJ  | 53.8      | 36.5        | 28.2                  | Washout         | HT     | 56      | Sphyg.                      | Omron M4, HEM-722C | 2                | ME   | 7 d  |
| Ewald S      | 57.7      | 54.7        | 28.1                  | T, NonT         | HT     | 53      | NA                          | TensioPhone 2      | ≥1               | ME   | ?    |
| Karotsis AK  | 63.9      | 44          | 28.6                  | Treated         | HT     | 185     | A&D767                      | A&D767             | ?                | ME   | 3 d  |
| Yamagishi T  | 58        | 42.6        | 23.8                  | T, NonT         | Mo. HT | 54      | NA                          | Omron HEM401C      | 1                | ME   | ?    |
|              | 61.7      | 42.6        | 24.1                  | T, NonT         | Mo. HT | 54      | NA                          | Omron HEM401C      | 1                | ME   | ?    |
| Yamagishi T  | 61.7      | 62.8        | 24.6                  | T               | HT     | 43      | NA                          | Automatic          | 1                | M    | ?    |
|              | 61.6      | 53.3        | 23.7                  | Non T           | HT     | 15      | NA                          |                    | 1                | M    | ?    |
| Ashizawa N   | 66.9      | 56.5        | NA                    | Treated         | HT     | 23      | NA                          | Automatic          | ?                | ME   | ?    |
| Ikeda T      | 57.5      | 75.5        | 24.1                  | Treated         | HT     | 49      | Omron, HEM907               | Omron HEM-737      | 2                | ME   | ?    |

|            |      |      |      |         |    |     |                 |                 |    |    |     |
|------------|------|------|------|---------|----|-----|-----------------|-----------------|----|----|-----|
| Verberk WJ | 55   | 55   | 28   | T, NonT | HT | 214 | Omron, HEM705CP | Omron, HEM705CP | 3  | ME | 7 d |
| Eguchi K   | 70.2 | 45.1 | 24.1 | T, NonT | HT | 308 | Omron, HEM705IT | Omron, HEM705IT | 2  | ME | 3 d |
| Nakamoto H | 51.4 | 71.4 | NA   | NA      | HT | 21  | Omron, HEM705IT | Omron, HEM705IT | ≥1 | ME | ?   |
|            | 54.2 | 68.4 | NA   | NA      | HT | 19  | Omron, HEM705IT | Omron, HEM705IT | ≥1 | ME | Tel |

NA indicates not applicables; T, treated hypertension; non-T, non-treated hypertension; HT, hypertension; Mo. HT, morning HT; DM, diabetes; N. Sub., Number of enrolled subjctets; Sphyg., sphygnomamometer; N. HBP, number of home blood pressure measurements in one occasions; ME, morning and evening; M, morning; W, weeks; d, days; Tel, telemedicine. Paper of Suzuki et al. included subjects with chronic renal insufficiency. In the paper of Girerd X et al. home blood pressure was measured in the standing position.

**Changes in blood pressures and baseline blood pressure levels**

| First author | N    | Antihypertensive treatments                                                           |                                  |       |      | Reduction of systolic / diastolic BPs (mmHg) |         |        |         |         | Baseline systolic / diastolic BP levels (mmHg) |          |          |          |          |
|--------------|------|---------------------------------------------------------------------------------------|----------------------------------|-------|------|----------------------------------------------|---------|--------|---------|---------|------------------------------------------------|----------|----------|----------|----------|
|              |      | Drug name                                                                             | Dose                             | Night | Dur. | CBP                                          | HBP     | MoBP   | EveBP   | 24hBP   | CBP                                            | HBP      | MoBP     | EveBP    | 24hBP    |
| Mengden T    | 19   | Amlodipine                                                                            | 5mg                              | No    | 4W   | 13 / 8                                       | 12 / 7  | 10 / 6 | 13 / 7  | NA      | 158 / 103                                      | 151 / 98 | 149 / 96 | 153 / 99 | NA       |
|              | 19   | Amlodipine                                                                            | 5mg                              | Yes   | 4W   | 12 / 5                                       | 7 / 4   | 6 / 3  | 8 / 5   | NA      | 158 / 103                                      | 151 / 98 | 149 / 96 | 153 / 99 | NA       |
| Chatellier G | 816  | Trandpril                                                                             | 2mg                              | No    | 4W   | 22 / 15                                      | 14 / 9  | 13 / 8 | 15 / 9  | NA      | 166 / 101                                      | 153 / 94 | 153 / 94 | 154 / 94 | NA       |
| Vaur L       | 24   | Trandpril                                                                             | 2mg                              | No    | 4W   | 10 / 8                                       | 11 / 6  | 10 / 5 | 11 / 6  | NA      | 163 / 101                                      | 146 / 94 | NA       | NA       | NA       |
| Bailey B     | 31   | Perindopril                                                                           | NA                               | No    | 2M   | 8 / 4                                        | 8 / 4   | 7 / 5  | 9 / 6   | NA      | 156 / 93                                       | 146 / 89 | 147 / 90 | 145 / 87 | 137 / 79 |
| Fernandez-G  | 1395 | Verapamil SR                                                                          | 240mg                            | No    | 12W  | 20 / 13                                      | 17 / 11 | NA     | NA      | NA      | 166 / 98                                       | 159 / 93 | NA       | NA       | NA       |
| Leeman MJ    | 760  | Diltiazem SR                                                                          | 300mg                            | No    | 2M   | 20 / 13                                      | 11 / 8  | NA     | NA      | NA      | 162 / 99                                       | 155 / 95 | NA       | NA       | NA       |
| Ragot S      | 105  | Losartan                                                                              | 50mg                             | No    | 6W   | 17 / 14                                      | 9 / 4   | 7 / 3  | 11 / 6  | 7 / 5   | 160 / 100                                      | 144 / 89 | NA       | NA       | 138 / 86 |
|              | 94   | Trandpril                                                                             | 2mg                              | No    | 6W   | 16 / 12                                      | 10 / 5  | 8 / 5  | 11 / 6  | 8 / 5   | 160 / 100                                      | 144 / 91 | NA       | NA       | 137 / 85 |
| Broege PA    | 20   | Cholrthalidone<br>Additionally Prinivil                                               | 12.5-25mg<br>10-20mg             | No    | 3M   | -3 / -5                                      | 2 / 0   | NA     | NA      | NA      | 153 / 78                                       | 140 / 77 | NA       | NA       | NA       |
| Mancia G     | 215  | Valsartan                                                                             | 80mg                             | No    | 8W   | 10 / 7                                       | 8 / 5   | 7 / 4  | 9 / 6   | 8 / 5   | 158 / 101                                      | 150 / 96 | 149 / 96 | 150 / 95 | 144 / 89 |
|              | 211  | Irbesartan                                                                            | 150mg                            | No    | 8W   | 16 / 10                                      | 11 / 7  | 10 / 6 | 12 / 8  | 10 / 6  | 160 / 101                                      | 140 / 96 | 149 / 97 | 149 / 94 | 142 / 88 |
| Ragot S      | 217  | Telmisartan                                                                           | 40-80mg                          | No    | 12W  | 13 / 8                                       | 12 / 7  | NA     | NA      | NA      | 158 / 98                                       | 152 / 94 | NA       | NA       | NA       |
|              | 218  | Perindopril                                                                           | 4-8mg                            | No    | 12W  | 10 / 6                                       | 9 / 5   | NA     | NA      | NA      | 159 / 98                                       | 152 / 95 | NA       | NA       | NA       |
| Stergiou GS  | 33   | Lisinopril                                                                            | 20mg                             | No    | 5W   | 15 / 10                                      | 17 / 10 | NA     | NA      | 12 / 8  | 144 / 96                                       | 145 / 93 | NA       | NA       | 137 / 88 |
|              | 33   | Losartan                                                                              | 50mg                             | No    | 5W   | 8 / 5                                        | 8 / 5   | NA     | NA      | 7 / 5   | 144 / 96                                       | 145 / 93 | NA       | NA       | 137 / 88 |
| Suzuki H     | 113  | Amlodipine<br>Benazepril                                                              | 5-20mg<br>2.5-5mg                | No    | 12M  | 19 / 20                                      | 20 / 16 | 19 / 9 | 22 / 23 | NA      | 148 / 89                                       | 155 / 91 | 160 / 90 | 150 / 92 | NA       |
| Mengden T    | 53   | Olmesartan                                                                            | 23.53 mg*                        | No    | 12W  | 27 / 16                                      | 9 / 7   | NA     | NA      | NA      | 163 / 96                                       | 150 / 86 | NA       | NA       | NA       |
| Mion D       | 65   | Amlodipine                                                                            | 2.5mg                            | No    | 16W  | 2 / 5                                        | 7 / 1   | 6 / 1  | 7 / 1   | 3 / 1   | 164 / 99                                       | 160 / 94 | 159 / 94 | 161 / 93 | 155 / 93 |
|              |      | Lisinopril,<br>Hydrochlorotiazide,                                                    | 10-20mg<br>25mg                  |       |      |                                              |         |        |         |         |                                                |          |          |          |          |
| Staessen JA  | 197  | Amlodipine, or<br>Prazosin<br>by CBP guided Tx.                                       | 5-10mg<br>6mg                    | No    | 12M  | 22 / 14                                      | 16 / 10 | NA     | NA      | 14 / 10 | 159 / 102                                      | 146 / 92 | NA       | NA       | 141 / 88 |
|              | 203  | Lisinopril,<br>Hydrochlorotiazide,<br>Amlodipine, or<br>Prazosin<br>by HBP guided Tx. | 10-20mg<br>25mg<br>5-10mg<br>6mg | No    | 12M  | 15 / 10                                      | 11 / 7  | NA     | NA      | 10 / 7  | 161 / 102                                      | 147 / 92 | NA       | NA       | 142 / 88 |
| Girerd X     | 171  | Valsartan<br>Hydrochlorothiazide                                                      | 160mg<br>12.5mg                  | No    | 6W   | 6 / 4                                        | 6 / 4   | NA     | NA      | NA      | 157 / 91                                       | 152 / 87 | NA       | NA       | NA       |
| Halme L      | 113  | Any                                                                                   | NA                               | NA    | 6M   | 12 / 7                                       | 8 / 3   | NA     | NA      | NA      | 160 / 94                                       | 143 / 85 | NA       | NA       | NA       |

|             |     |                                                                       |                         |     |     |         |         |         |         |         |              |          |          |          |          |
|-------------|-----|-----------------------------------------------------------------------|-------------------------|-----|-----|---------|---------|---------|---------|---------|--------------|----------|----------|----------|----------|
| Borie G     | 227 | Valsartan<br>Hydrochlorothiazide                                      | 80mg<br>12.5mg          | No  | 8W  | 11 / 6  | 11 / 7  | 10 / 7  | 12 / 8  | NA      | 153 / 90     | 149 / 89 | NA       | NA       | NA       |
|             | 222 | Irbesartan<br>Hydrpchlorothiazide                                     | 150mg<br>12.5mg         | No  | 8W  | 15 / 8  | 13 / 10 | 12 / 9  | 14 / 10 | NA      | 153 / 91     | 149 / 90 | NA       | NA       | NA       |
| Hashimoto J | 76  | Indapamide                                                            | 1mg                     | No  | 4W  | 9 / 5   | 12 / 6  | 12 / 6  | 12 / 6  | NA      | 145 / 86     | 143 / 83 | 147 / 87 | 138 / 79 | NA       |
| Kamoi K     | 50  | Doxazosin                                                             | 2.9mg*                  | Yes | 3M  | 9 / 4   | 18 / 5  | 18 / 5  | NA      | NA      | 151 / 87     | 164 / 85 | 164 / 85 | NA       | NA       |
| Niiranen TJ | 56  | Candesartan<br>Hydroclorothiazide<br>Felodipine<br>(Stepwisely added) | 8-16mg<br>12.5mg<br>5mg | No  | 24W | 18 / 10 | 17 / 10 | NA      | NA      | 17 / 11 | 149.3 / 94.4 | 143 / 91 | NA       | NA       | 145 / 91 |
| Ewald S     | 53  | Olmesartan                                                            | 23.5mg*<br>12.5mg       | No  | 12W | 29 / 16 | 9 / 7   | NA      | NA      | NA      | 163 / 96     | 148 / 86 | NA       | NA       | NA       |
| Karotsis AK | 185 | Chlorthalidone,<br>Felodipine,<br>Lisinopril, or<br>Valsartan         | 5mg<br>10mg<br>80mg     | No  | 8W  | 21 / 7  | 15 / 6  | NA      | NA      | NA      | 160 / 86     | 150 / 83 | NA       | NA       | NA       |
| Yamagishi T | 54  | Azelnidipine                                                          | 8-16mg                  | No  | 8W  | 28 / 17 | 24 / 14 | 24 / 14 | NA      | NA      | 166 / 99     | 160 / 98 | 160 / 98 | NA       | NA       |
|             | 54  | Amlodipine                                                            | 5-10mg                  | No  | 8W  | 23 / 14 | 21 / 12 | 21 / 12 | NA      | NA      | 157 / 96     | 155 / 95 | 155 / 95 | NA       | NA       |
| Yamagishi T | 43  | Cilnidipine                                                           | 10-20mg                 | Yes | 8W  | 15 / 9  | 12 / 7  | 12 / 7  | NA      | NA      | 146 / 88     | 146 / 89 | 146 / 89 | NA       | NA       |
|             | 15  | Cilnidipine                                                           | 10-20mg                 | Yes | 8W  | 30 / 19 | 19 / 12 | 19 / 12 | NA      | NA      | 164 / 100    | 150 / 95 | 150 / 95 | NA       | NA       |
| Ashizawa    | 23  | Cilnidipine                                                           | 10mg                    | Yes | NA  | 7 / 2   | 12 / 4  | 18 / 10 | 6 / 3   | NA      | 144 / 84     | 143 / 82 | 150 / 88 | 136 / 75 | NA       |
| Ikeda       | 49  | Doxazosin                                                             | 2.4mg*                  | Yes | 12M | 2 / 3   | 7 / 4   | 13 / 8  | 1 / 1   | NA      | 138 / 88     | 137 / 86 | 146 / 92 | 129 / 80 | NA       |
| Verberk WJ  | 214 | NA                                                                    | NA                      | NA  | 48W | 22 / 12 | 22 / 12 | NA      | NA      | 18 / 11 | 166 / 97     | 156 / 93 | NA       | NA       | 144 / 88 |
| Eguchi K    | 308 | Doxazosin,<br>Atenolol<br>(Stepwisely added)                          | 3.4mg*,<br>12.6mg*      | Yes | 6M  | 12 / 10 | 10 / 7  | 13 / 8  | 8 / 6   | NA      | 157 / 83     | 146 / 79 | 153 / 82 | 140 / 75 | NA       |
| Nakamoto H  | 21  | Telmisartan                                                           | 44.76mg*                | No  | 8W  | 19 / 9  | 10 / 10 | 15 / 11 | 13 / 9  | NA      | 167 / 97     | 144 / 93 | 145 / 93 | 144 / 93 | NA       |
|             | 19  | Amlodipine                                                            | 4.87mg*                 | No  | 8W  | 14 / 10 | 8 / 6   | 13 / 8  | 6 / 4   | NA      | 164 / 95     | 143 / 91 | 144 / 92 | 140 / 90 | NA       |

CBP indicates clinic blood pressure; HBP, home blood pressure; MoBP, morning blood pressure; EveBP, evening blood pressure; 24hBP, 24-hr average ambulatory blood pressure. Dose of antihypertensive medication with \* is shown in the average.
